# Supplementary material for: Sea cucumber chondroitin sulfate polysaccharides attenuate OVA-induced food allergy in BALB/c mice associated with gut microbiota metabolism and Treg cell differentiation
Source: Royal Society of Chemistry journal article supplement (doi:10.1039/d3fo00146f), 2023-01-01
Supplement: d3fo00146f1.pdf [file d3fo00146f1.pdf]

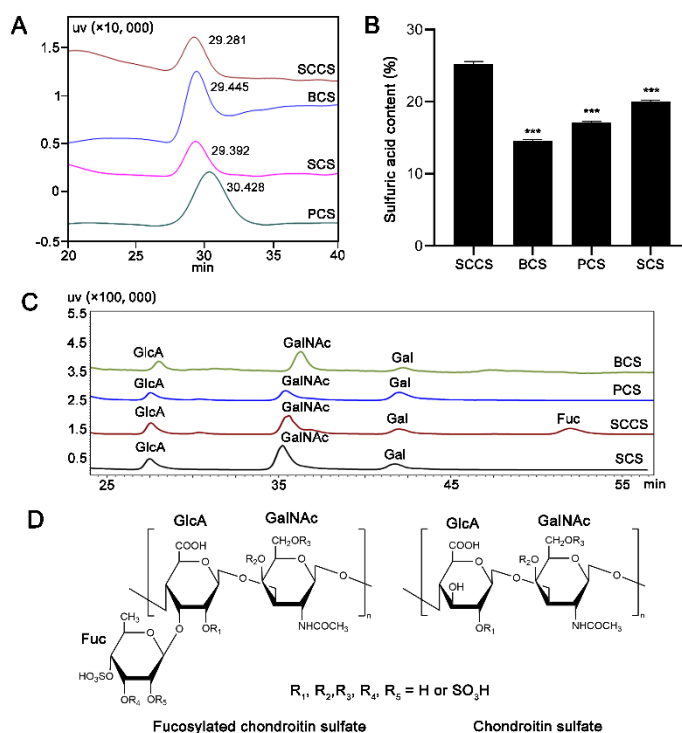

Figure S1. The chemical characterization of the SCCS, BCS, PCS and SCS. Molecular weight determination of SCCS, BCS, PCS, and SCS (A). Sulfuric acid content of SCCS, BCS, PCS, and SCS (B). HPLC chromatograms of SCCS, BCS, PCS, and SCS monosaccharide composition (C). Different chemical structures of chondroitin sulfates (D).

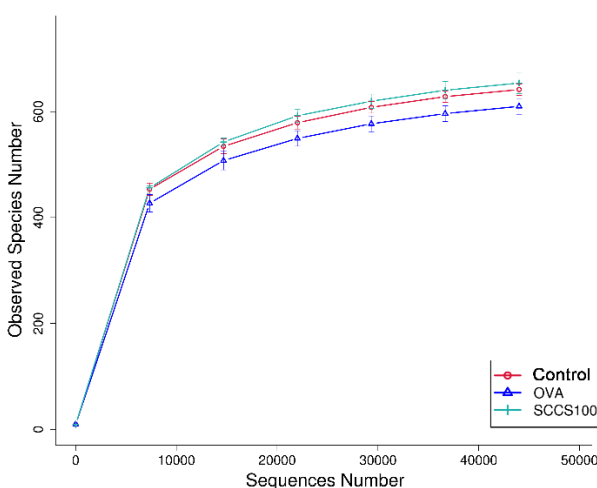

Figure S2. Rarefaction Curve.

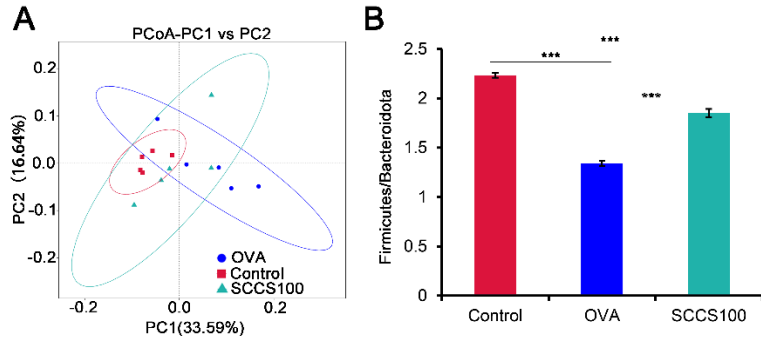

Figure S3. Effect of SCCS on intestinal microorganisms in mice.

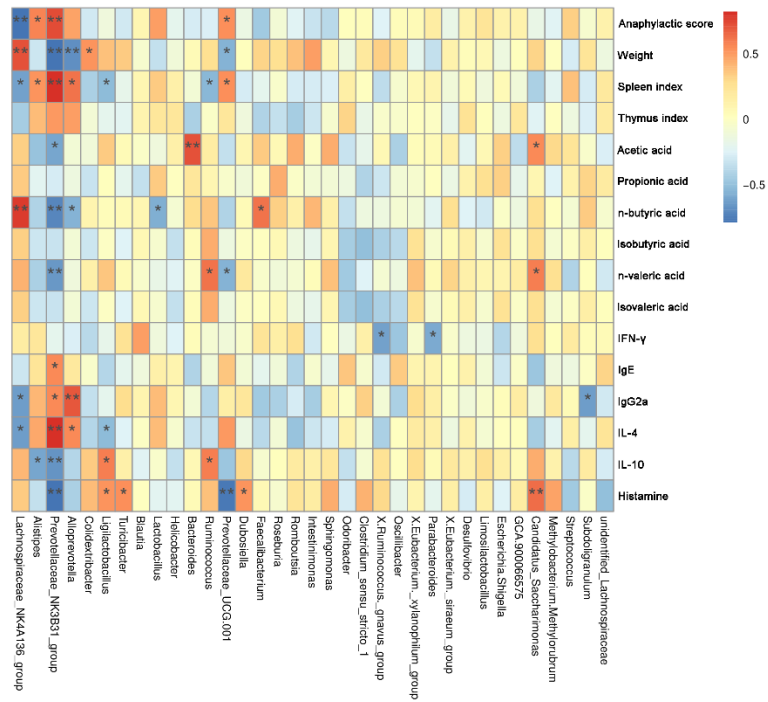

Figure S4. Association analysis of genus-level intestinal microorganisms with the correlation index of SCCS intervention in sensitized mice.
